# Supplementary material for: Moderate Physical Activity Increases the Expression of ADNP in Rat Brain
Source: MDPI journal article supplement (doi:10.3390/ijms25084382), 2024-04-16
Supplement: s1 [file s1]

## SUPPLEMENTARY DATA

**Table S1. Statistical Analysis Details.**

| Fig. # | Statistical test                | Factors, Degree of freedom & F/t value | Significance |
|--------|---------------------------------|----------------------------------------|--------------|
| 1B     | Unpaired t test<br>(Two-tailed) | t=5.082, df=22                         | ****         |
| 2B     | Unpaired t test<br>(Two-tailed) | t=11.84, df=22                         | ****         |
| 3C     | Unpaired t test<br>(Two-tailed) | t=10.69, df=22                         | ****         |
| 4D     | Unpaired t test<br>(Two-tailed) | t=14.48, df=22                         | ****         |
| 1C     | Unpaired t test<br>(Two-tailed) | t=10.57, df=22                         | ****         |
| 2C     | Unpaired t test<br>(Two-tailed) | t=7.616, df=22                         | ****         |
| 3C     | Unpaired t test<br>(Two-tailed) | t=13.46, df=22                         | ****         |
| 4D     | Unpaired t test<br>(Two-tailed) | t=11.90, df=22                         | ****         |

\*\*\*\*p<0.0001 vs. sedentary, as determined by unpaired two-tailed Student t-test.

**Figure S1. IHC original microphotographs.**

Scale Bar: 50  $\mu$ m and 10  $\mu$ m.

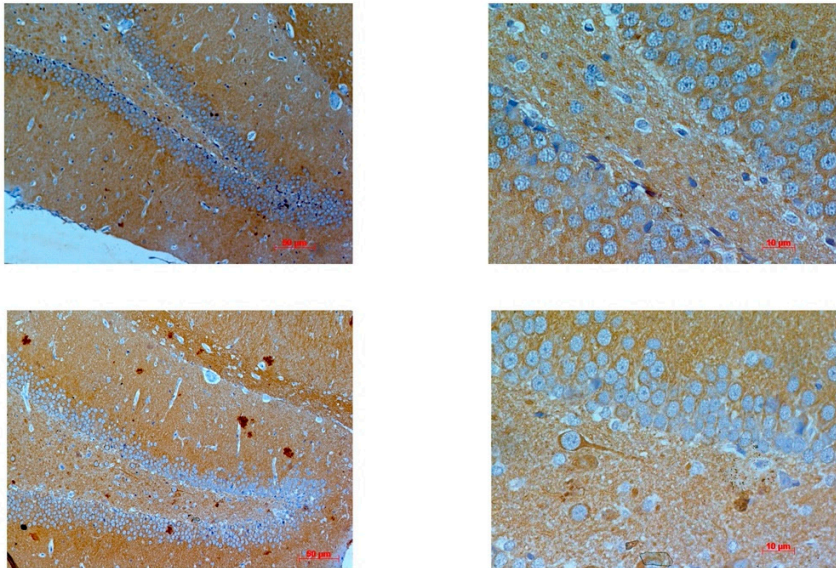

**Figure 1**

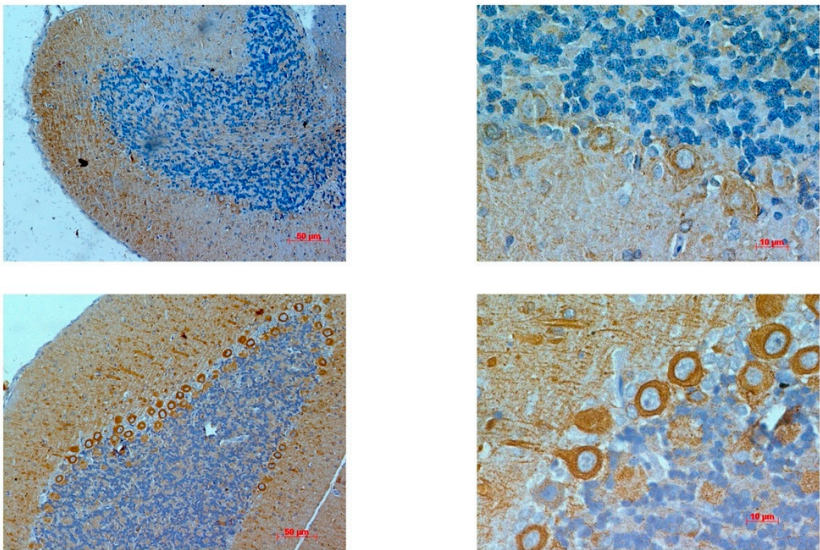

**Figure 2**

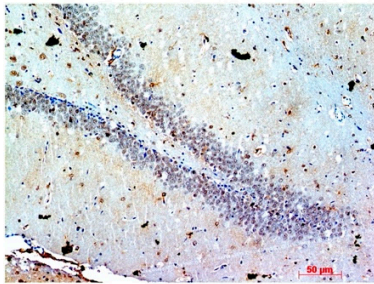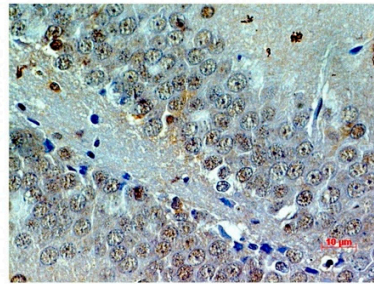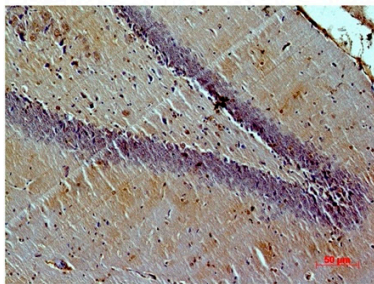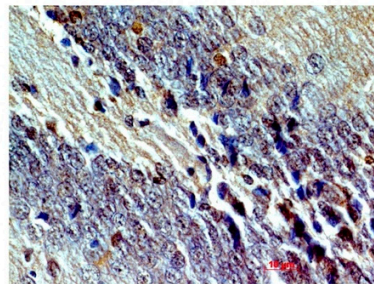

Figure 3

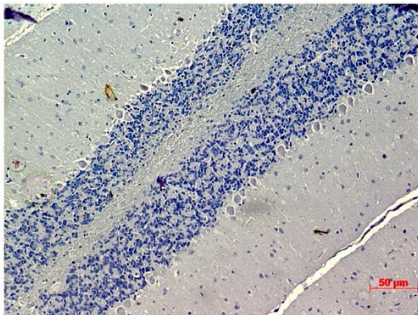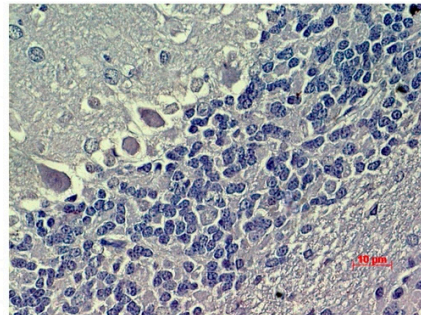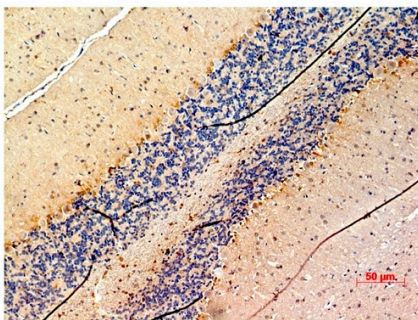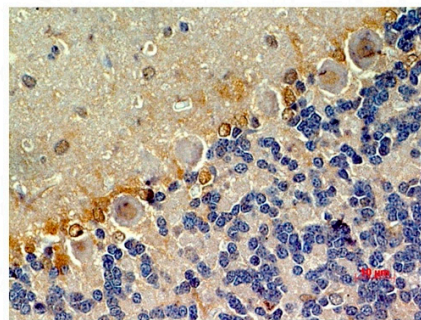

Figure 4



Figure S2. Original western blot.

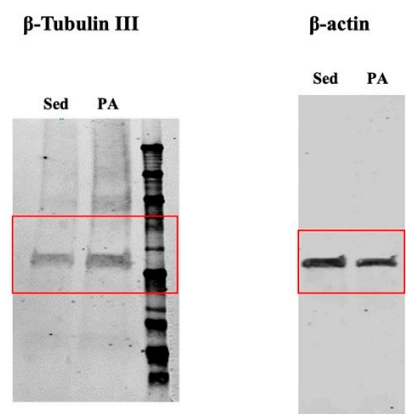

Figure 1

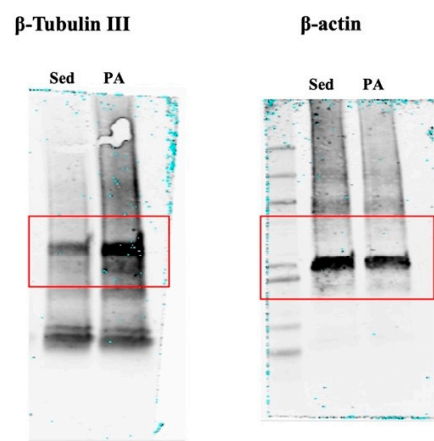

Figure 2

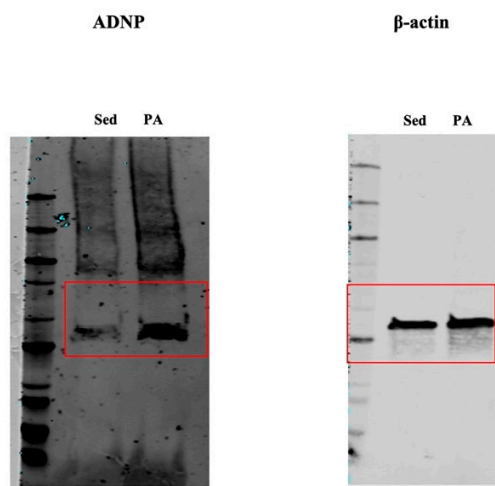

Figure 3

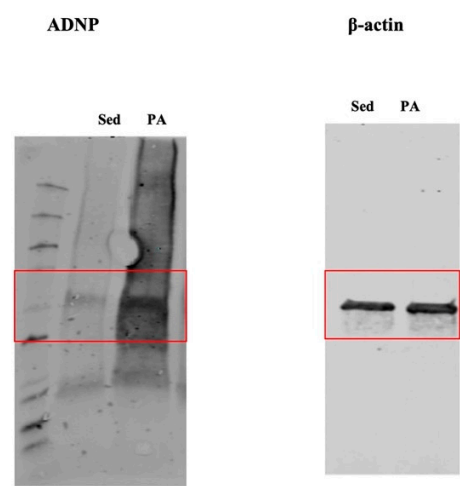

Figure 4

**Figure S3. IF original microphotographs.**

DG sedentary (scale bar: 20  $\mu\text{m}$  and 5  $\mu\text{m}$ )

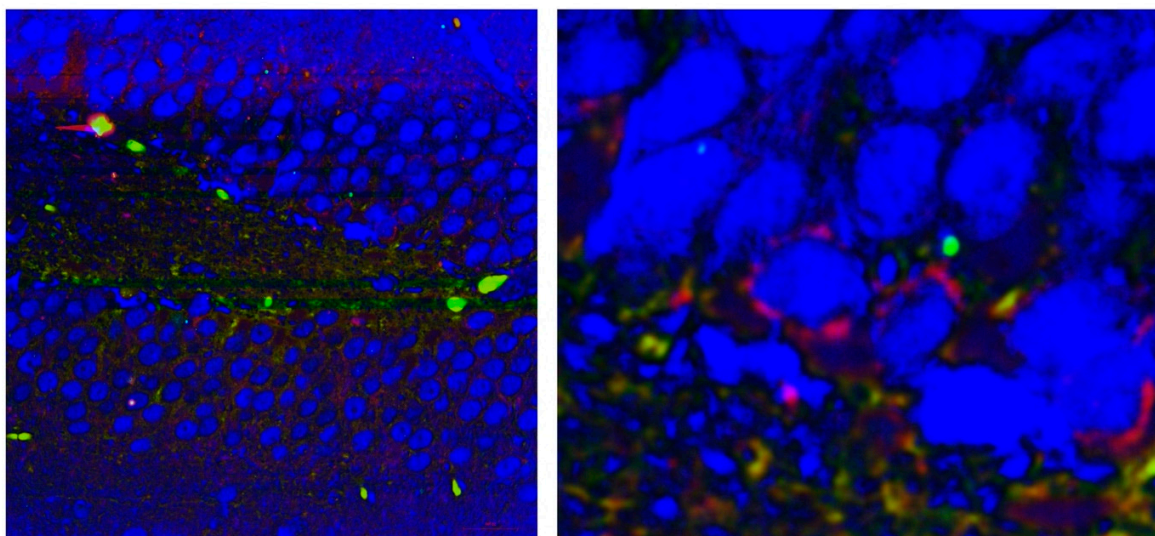

**Figure 5 – DG sedentary**

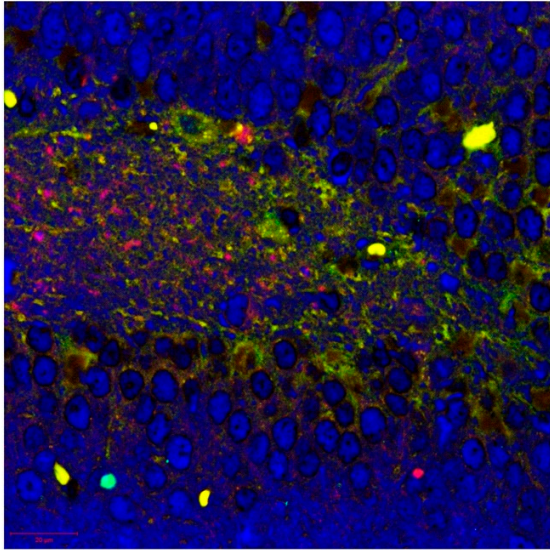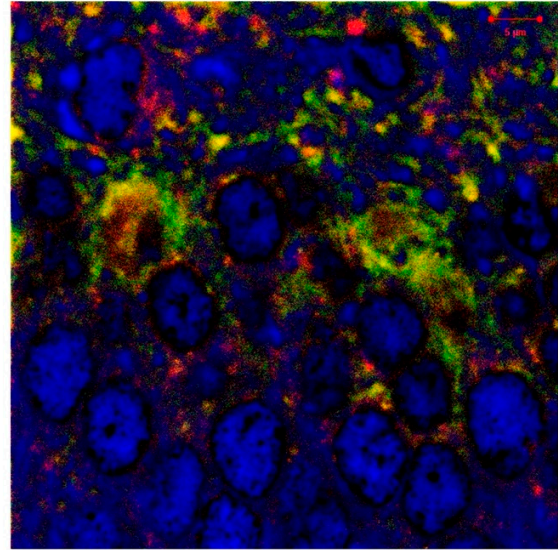

Figure 5 – DG PA

DG PA (scale bar: 20 μm and 5 μm)

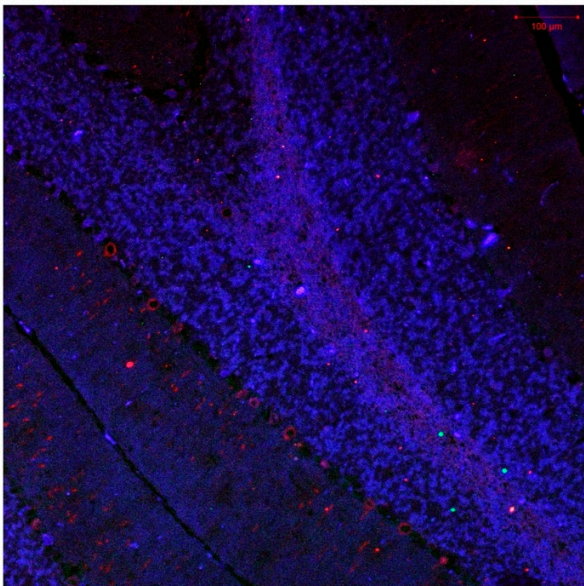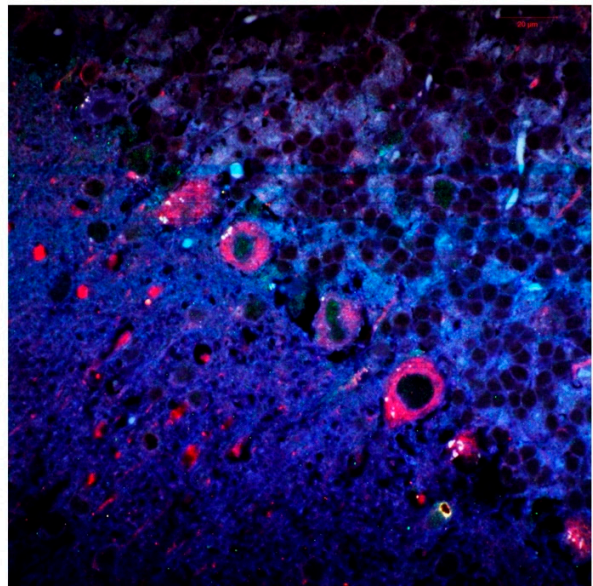

Figure 6 – cerebellum sedentary

cerebellum sedentary (scale bar: 100 μm and 20 μm)



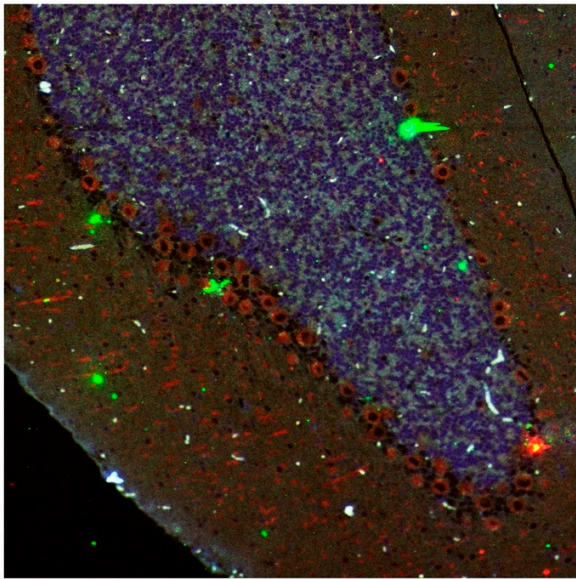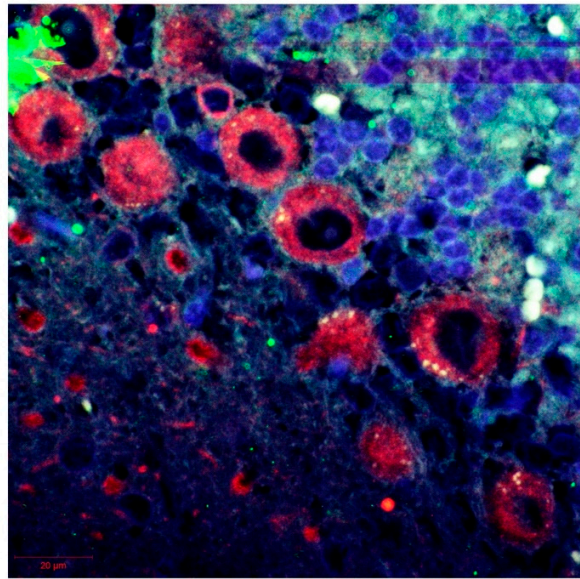

Figure 6 – cerebellum PA

Cerebellum PA (scale bar: 100  $\mu\text{m}$  and 20  $\mu\text{m}$ ).
